# Supplementary material for: An Unsupervised Machine Learning Approach to Evaluating the Association of Symptom Clusters With Adverse Outcomes Among Older Adults With Advanced Cancer: A Secondary Analysis of a Randomized Clinical Trial
Source: PubMed Central journal article supplement (PMC10034574; doi:10.1001/jamanetworkopen.2023.4198), 2023-03-22
Supplement: jamanetwopen-e234198-s003.pdf [file jamanetwopen-e234198-s003.pdf]

## Data Sharing Statement

Xu. An Unsupervised Machine Learning Approach to Evaluating the Association of Symptom Clusters With Adverse Outcomes Among Older Adults With Advanced Cancer. *JAMA Netw Open*. Published March 22, 2023. doi:10.1001/jamanetworkopen.2023.4198

### Data

**Data available:** No
